# Supplementary material for: Exogenous melatonin improved photosynthetic efficiency of photosystem II by reversible phosphorylation of thylakoid proteins in wheat under osmotic stress
Source: Front Plant Sci. 2022 Aug 2;13:966181. doi: 10.3389/fpls.2022.966181 (PMC9380962; doi:10.3389/fpls.2022.966181)
Supplement: Supplementary file 1 [file Data_Sheet_1.doc]

**Supplementary data**

[**Exogenous melatonin improved photosynthetic efficiency of photosystem II by reversible phosphorylation of thylakoid proteins in wheat under osmotic stress**](https://www.frontiersin.org/articles/10.3389/fpls.2020.615942/full)

Shuai Lin1, Xiao-Fang Song1, Hao-Tian Mao1, Shuang-Qing Li1, Jie-Ying Gan1, Ming Yuan1, Zhong-Wei Zhang2, Shu Yuan2, Huai-Yu Zhang1, Yan-Qiu Su3,*, Yang-Er Chen1,*

*1 College of Life Sciences, Sichuan Agricultural University, Ya’an 625014, China,* *2 College of Resources, Sichuan Agricultural University, Chengdu 611130, China, 3 College of Life Science, Sichuan Normal University, Chengdu, China*

*Correspondence:

Yang-Er Chen

anty9826@163.com

Yan-Qiu Su

[snowdream215@163.com](mailto:snowdream215@163.com)

**Supplementary data contents**

Supplemental Figures 1-10

**Supplemental Figures 1-10**


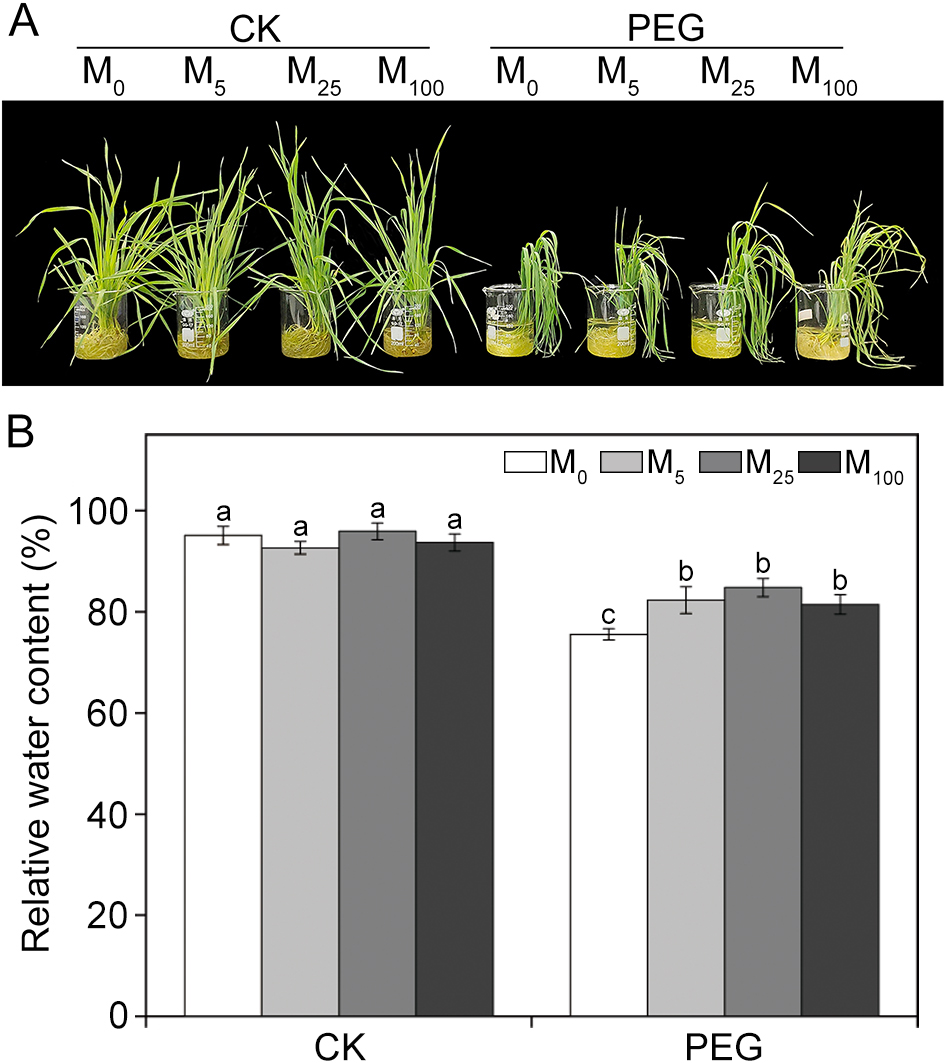


**FIGUR S1** Effects of melatonin on phenotype **(A)** and relative water content **(B)** in wheat seedlings under osmotic stress. Bars represent standard deviations from three independent biological replicates (*n* = 3). Different letters indicate significant differences (*P* < 0.05) according to Duncan’s multiplication range test. CK, non-stressed wheat plants; PEG, osmotic stress for 3 d; M0-M100 show 0, 5, 25, and 100 μM melatonin, respectively.


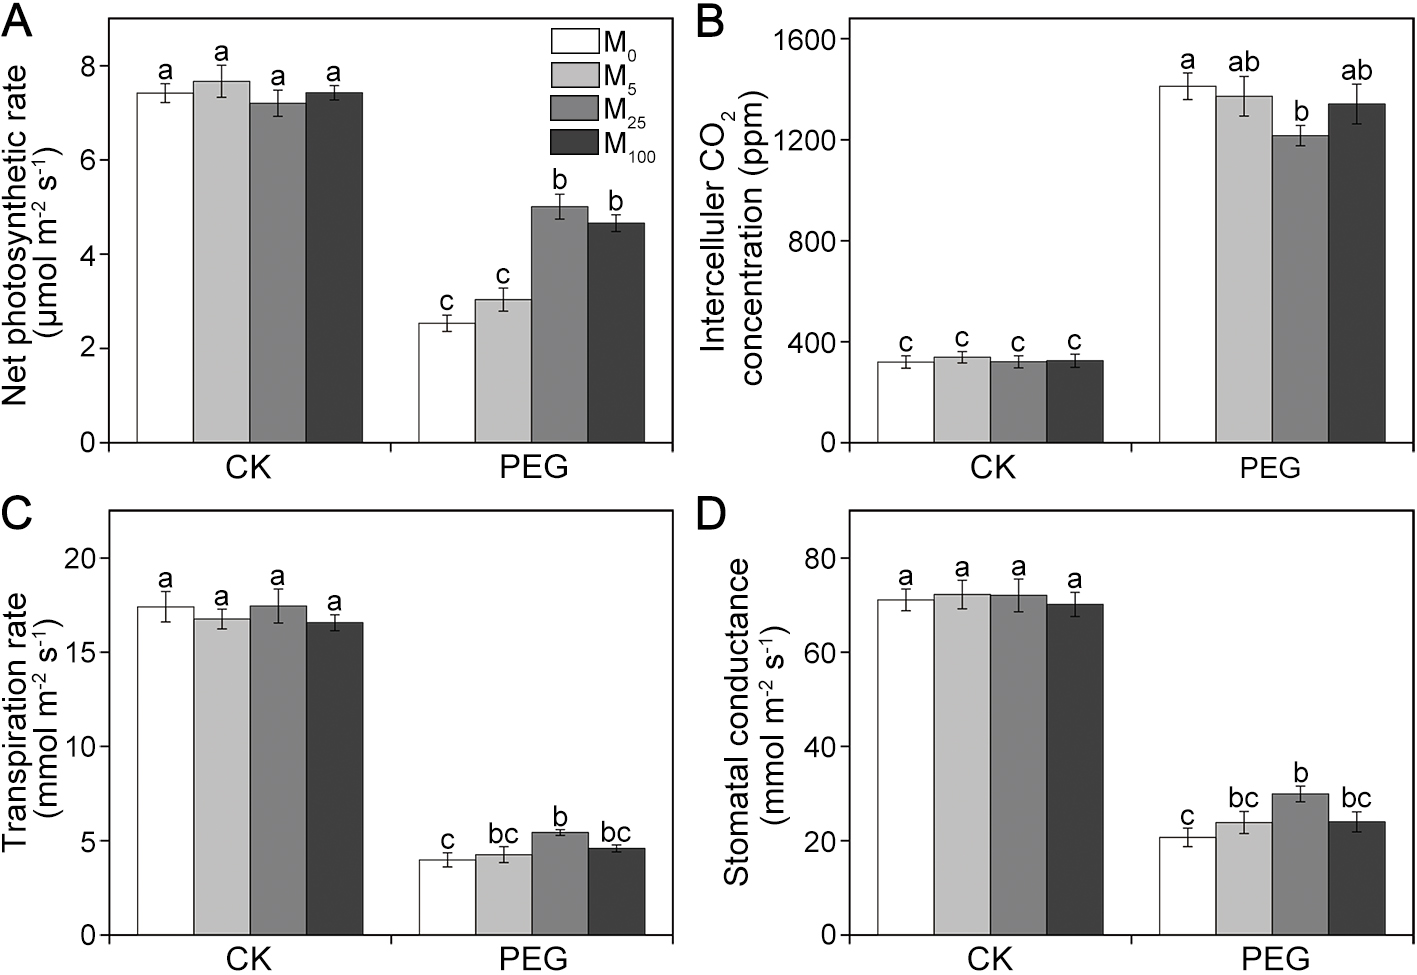


**FIGURE S2** Effects of melatonin on net photosynthetic rate **(A)**, intercellular CO2 concentration **(B)**, transpiration rate **(C)**, and stomatal conductance **(D)** in wheat seedlings under osmotic stress. Data is presented as mean ± SD for three replicates. Values followed by different letters are significantly different at *P* < 0.05 according to Duncan’s multiple range test. CK, non-stressed wheat plants; PEG, osmotic stress for 3 d; M0-M100 show 0, 5, 25, and 100 μM melatonin, respectively.


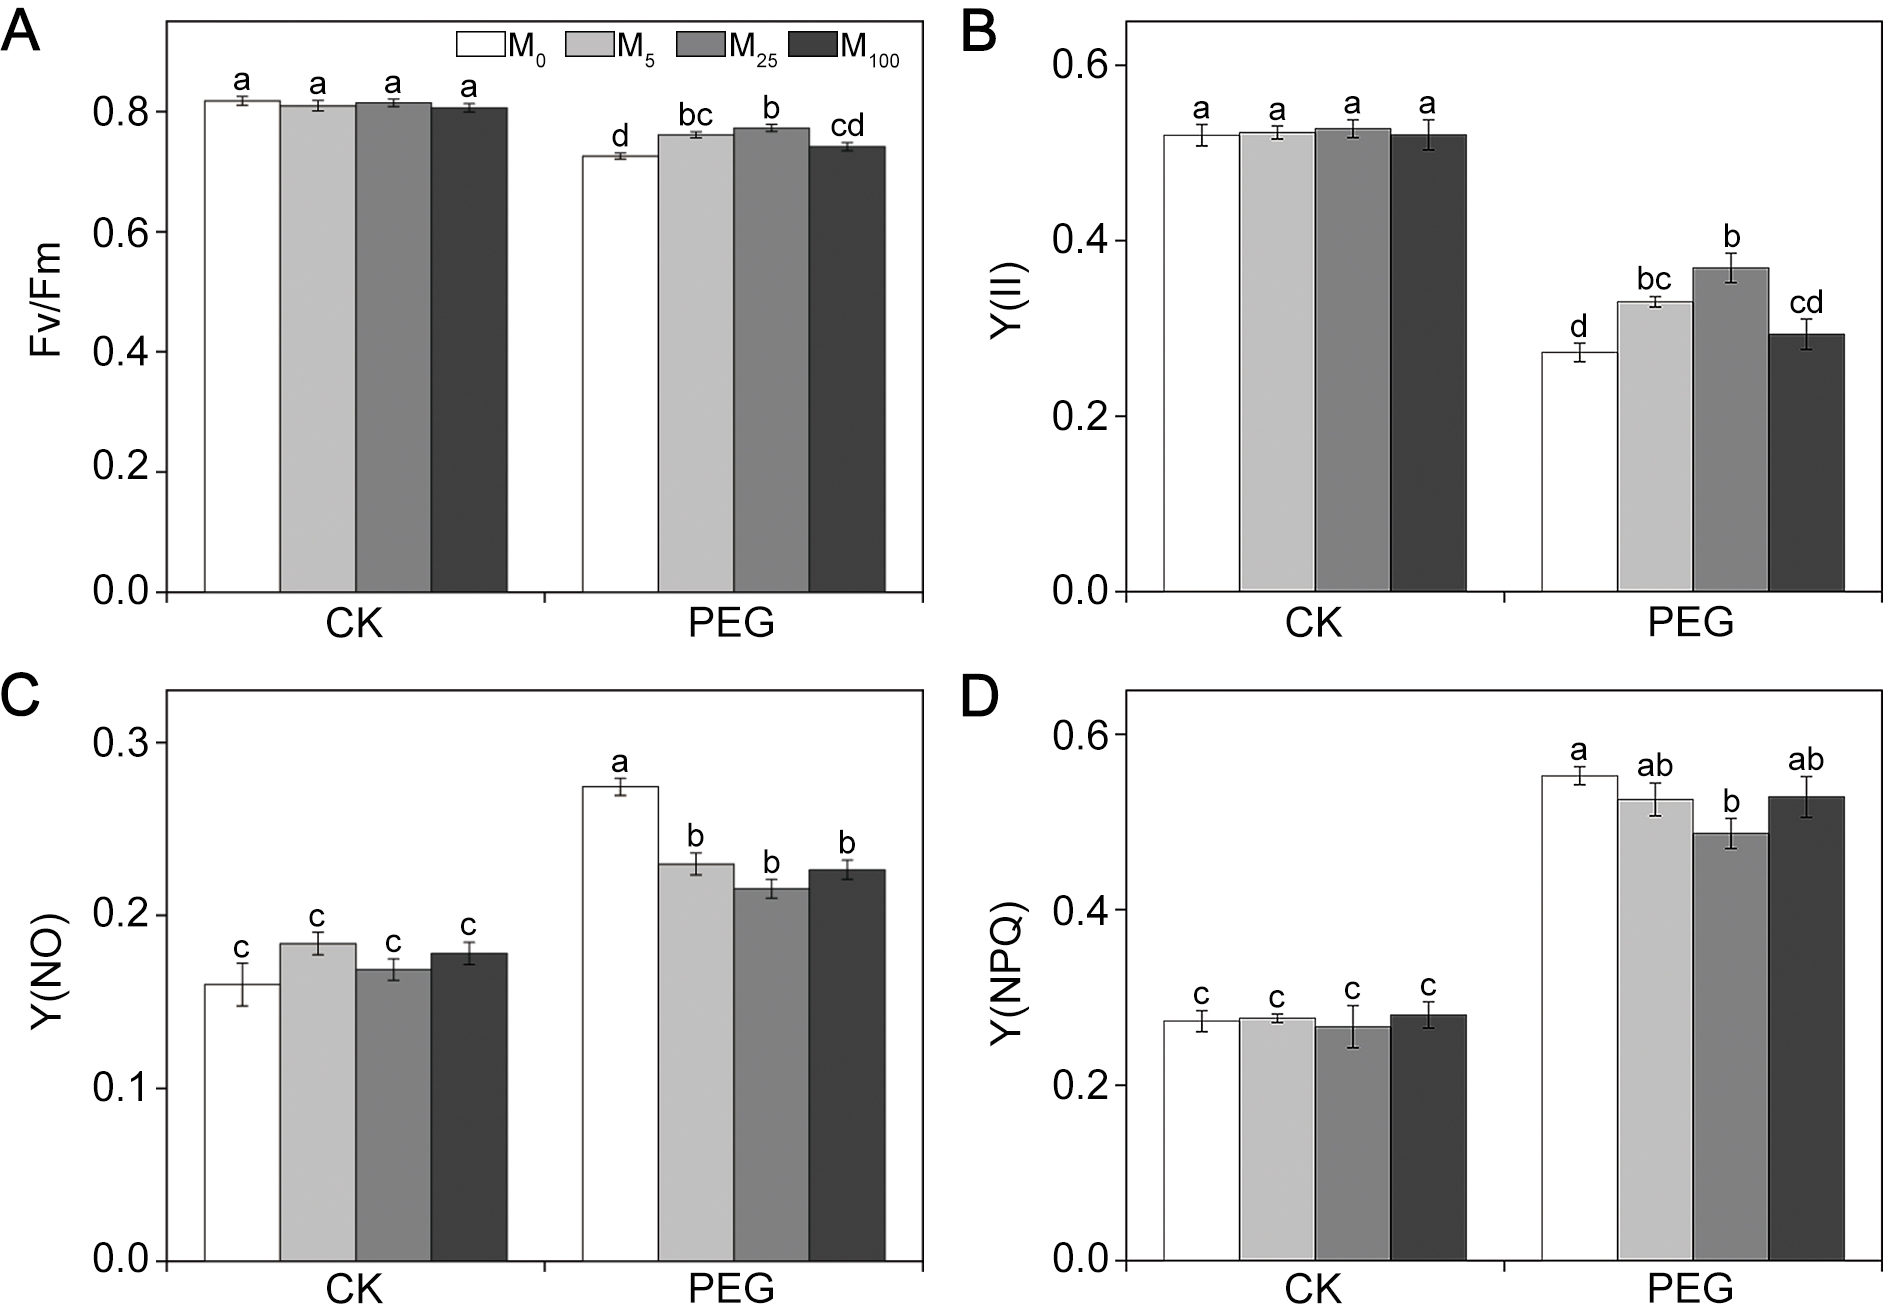


**FIGURE S3** Effects of melatonin on Fv/Fm **(A)**, Y(II) **(B)**, Y(NO) **(C)**, and Y(NPQ) **(D)** in wheat seedlings under osmotic stress. Data is presented as mean ± SD for three replicates. Values followed by different letters are significantly different at *P* < 0.05 according to Duncan’s multiple range test. CK, non-stressed wheat plants; PEG, osmotic stress for 3 d; M0-M100 show 0, 5, 25, and 100 μM melatonin, respectively.


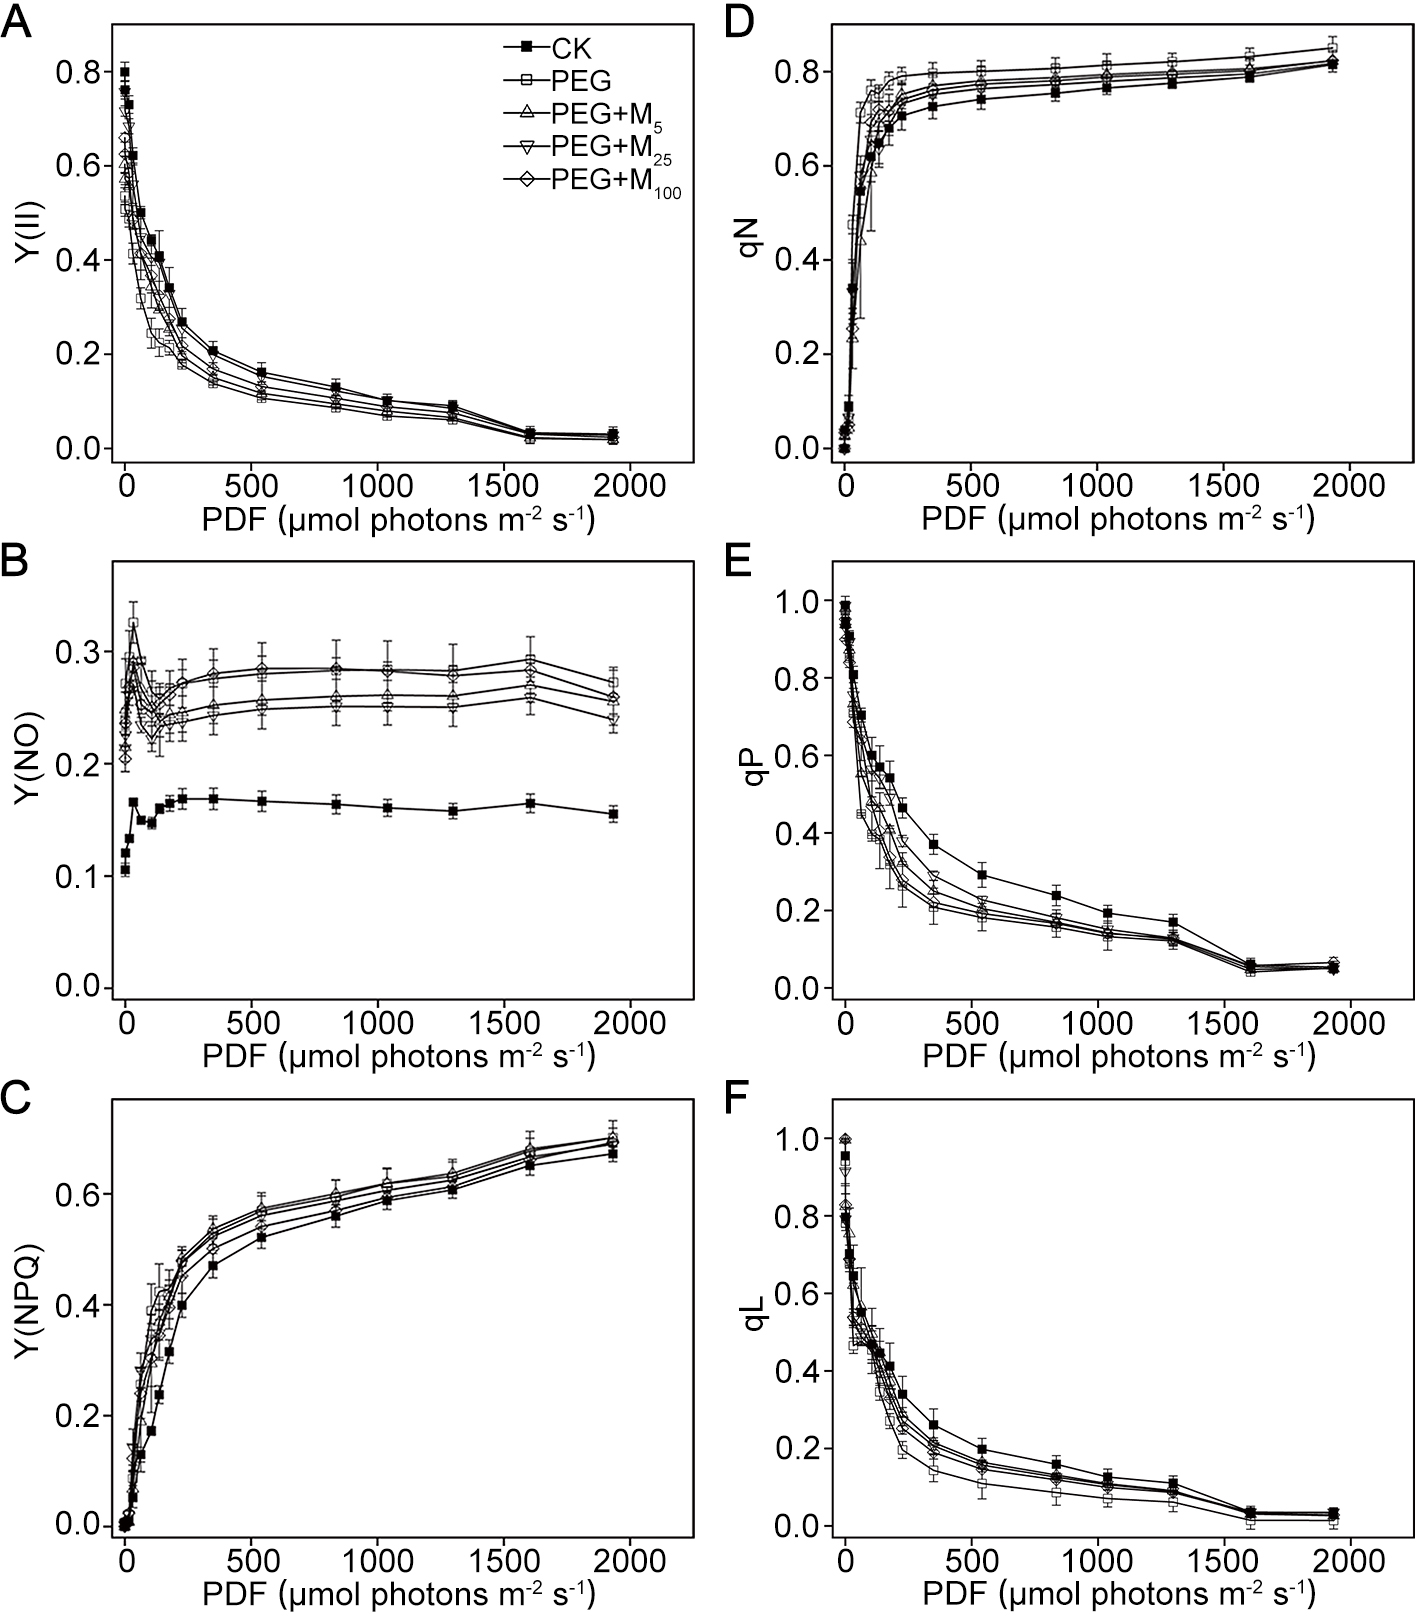


**FIGURE S4** Effects of melatonin on light response curves for Y(II) **(A)**, Y(NO) **(B)**, Y(NPQ) **(C)**, qN **(D)**, qP **(E)**, and qL **(F)** in wheat seedlings under osmotic stress. Bars represent standard deviations from three independent biological replicates (*n* = 3). CK, non-stressed wheat plants; PEG, osmotic stress for 3 d; M5-M100 show 5, 25, and 100 μM melatonin, respectively.


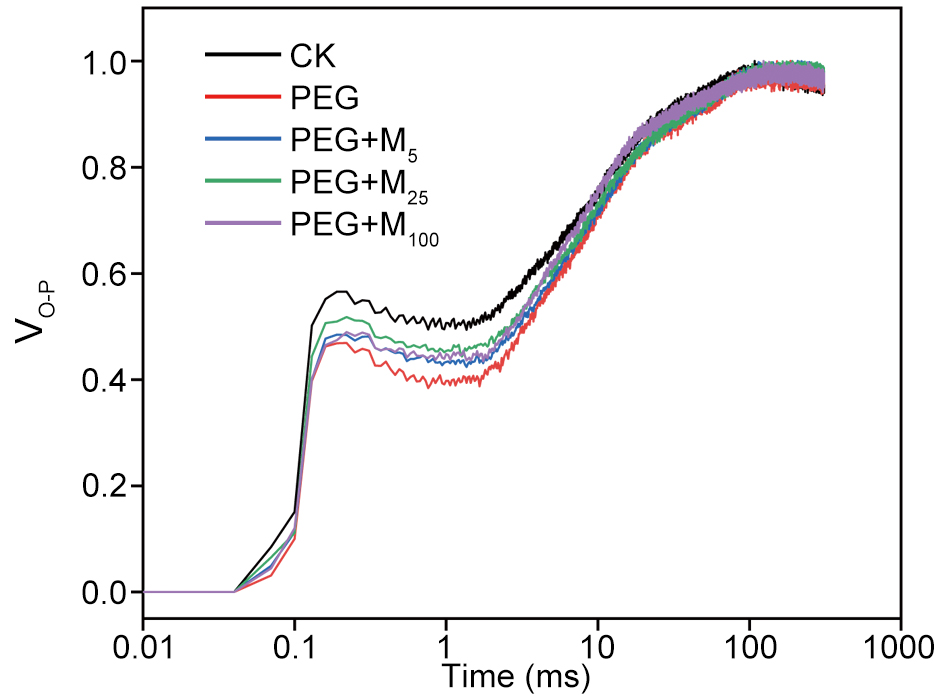


**FIGURE S5** Effects of melatonin on *V*O-P curves in wheat seedlings under osmotic stress. The data in the figure are from three replicated experiments (*n* = 3). CK, non-stressed wheat plants; PEG, osmotic stress for 3 d; M5-M100 show 5, 25, and 100 μM melatonin, respectively.


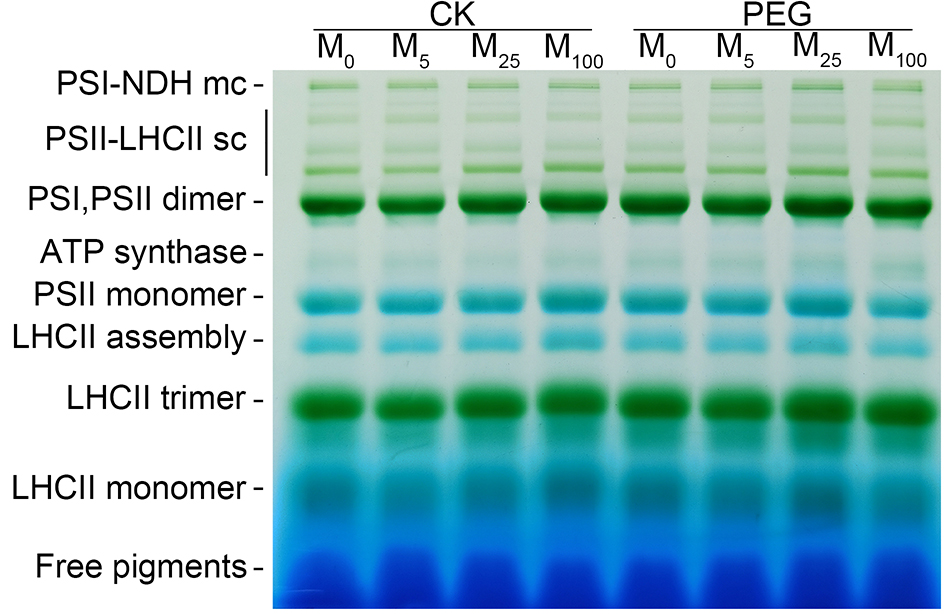


**FIGURE S6** Effects of melatonin on thylakoid membrane protein complexes in wheat seedlings under osmotic stress. CK, non-stressed wheat plants; PEG, osmotic stress for 3 d; M0-M100 show 0, 5, 25, and 100 μM melatonin, respectively.


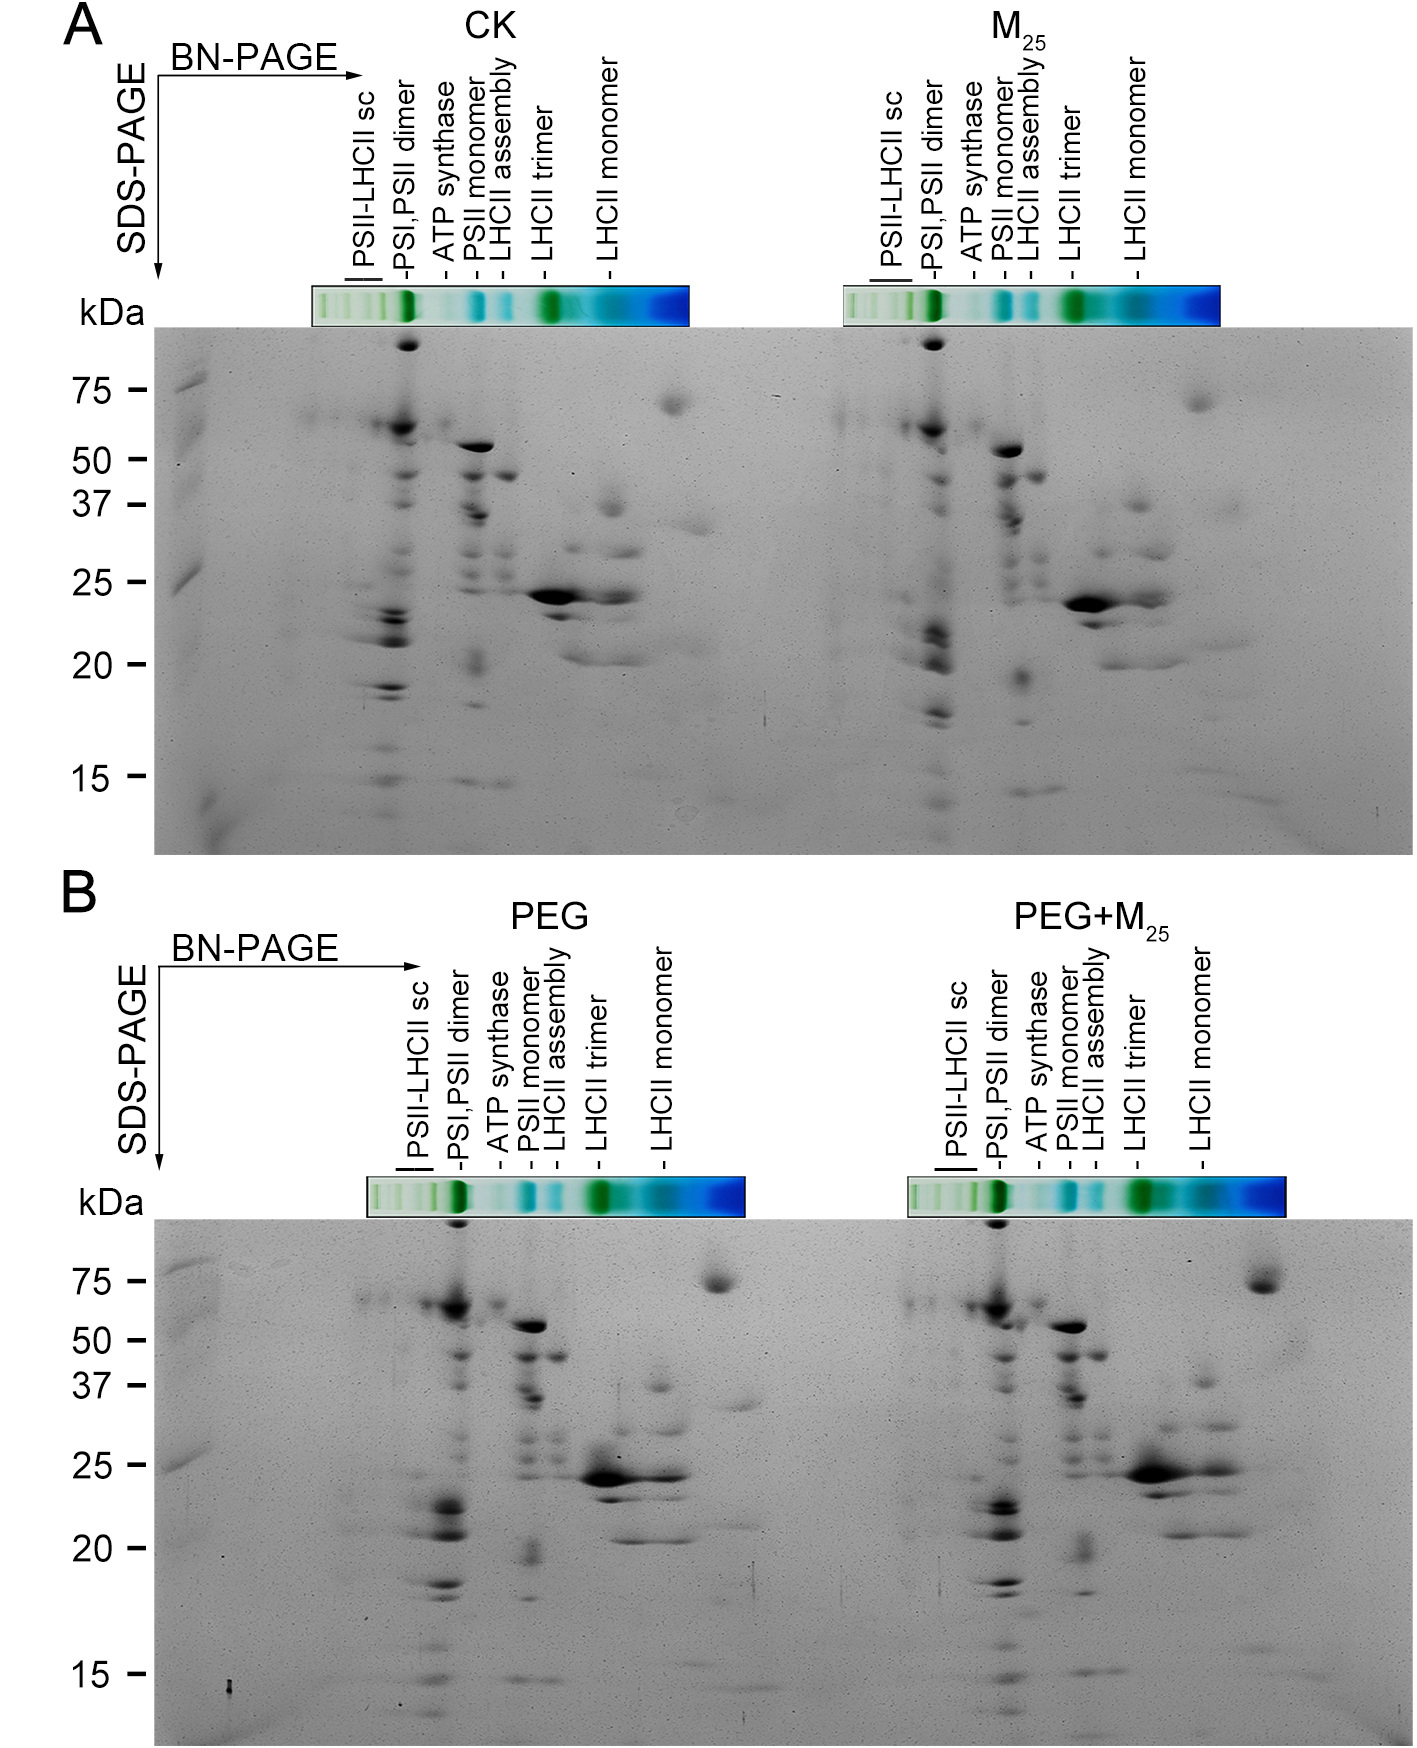


**FIGURE S7** Two-dimensional separation of thylakoid membrane protein complexes in wheat seedlings under osmotic stress. Thylakoid protein complexes separated in a BN-PAGE gel were subsequently separated in a second dimension by SDS-PAGE and Coomassie blue staining (CBS). CK, non-stressed wheat plants; PEG, osmotic stress for 3 d; M25, 25 μM melatonin.


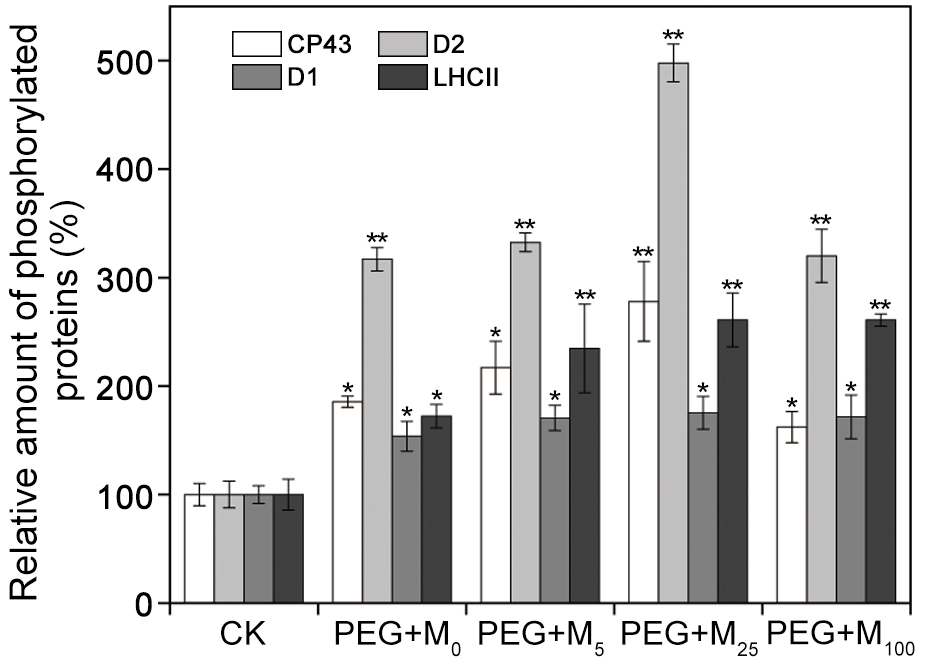


**FIGURE S8** Quantification of the immunoblots indicates the relative abundances of the phosphorylated proteins relative to the amount of control (100%). Values are the averages of 3 replicates ± SD. Asterisks indicate statistically significant differences at *P* < 0.05 level (Duncan’s multiple range test). CK, non-stressed wheat plants; PEG, osmotic stress for 3 d; M0-M100 show 0, 5, 25, and 100 μM melatonin, respectively.


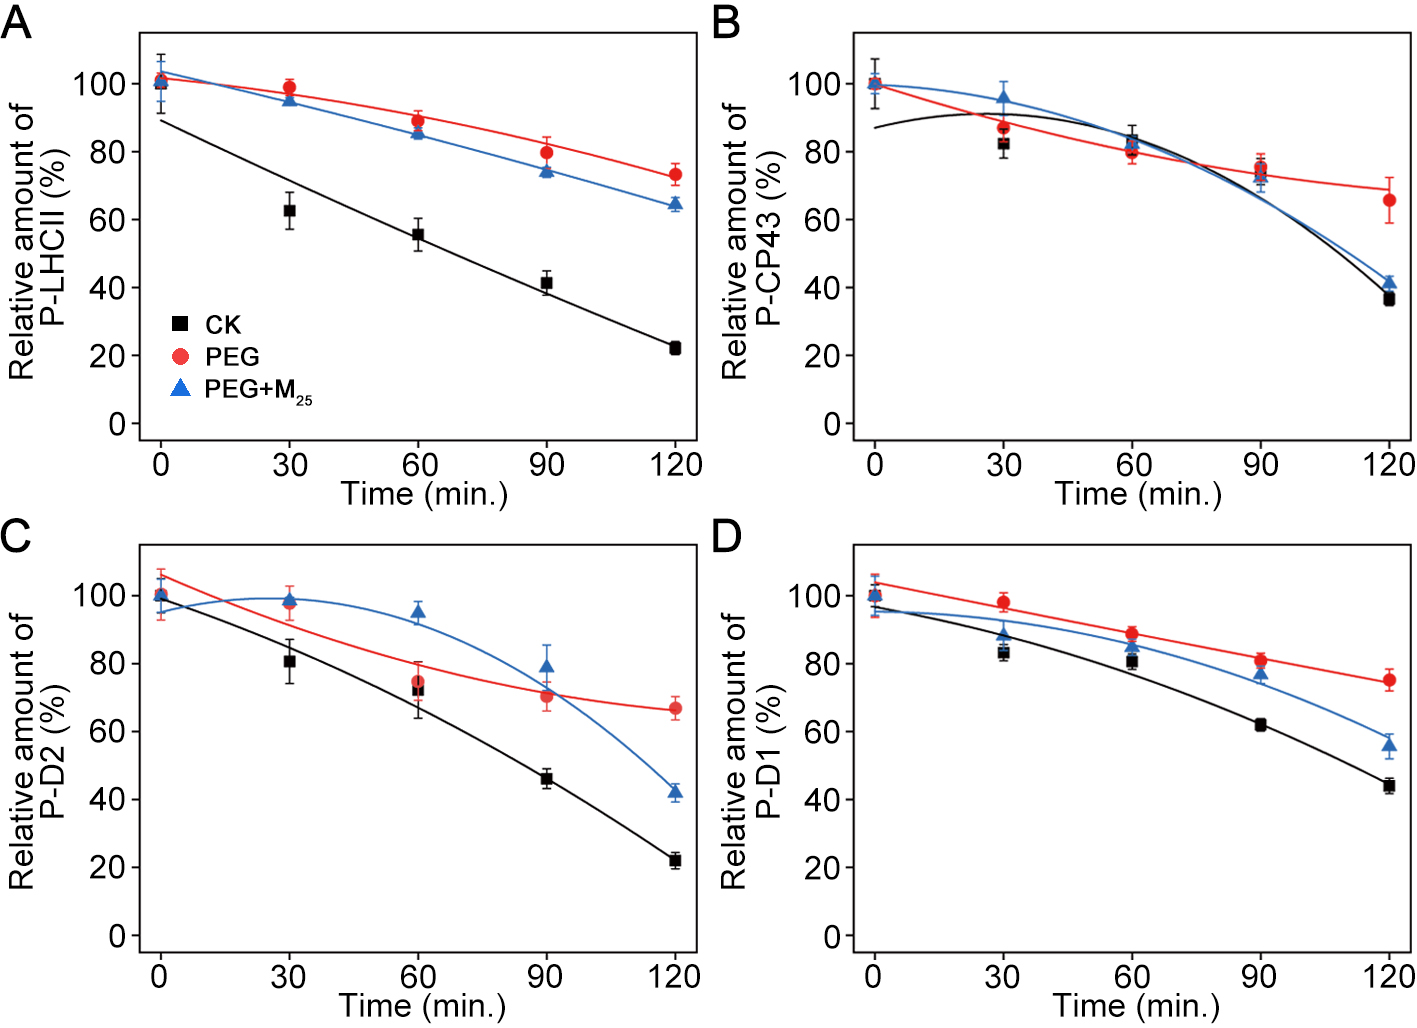


**FIGURE S9** Quantification of PSII protein dephosphorylation in wheat seedlings with 25 μM melatonin *in vivo* under osmotic stress. Results are presented relative to the amount of respective 0 min (100%). The line is a fit of all data to the descriptive hyperbolic equation y = ax2 + bx + c. CK, non-stressed wheat plants; PEG, osmotic stress for 3 d; M25, 25 μM melatonin.


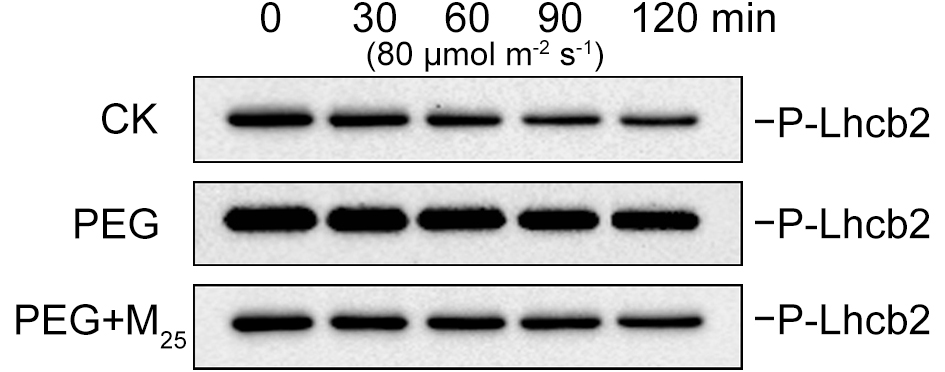


**FIGURE S10** Dephosphorylation of Lhcb2 from wheat seedlings with 25 μM melatonin *in vivo* under osmotic stress. CK, non-stressed wheat plants; PEG, osmotic stress for 3 d; M25, 25 μM melatonin.
